# Supplementary material for: Policy uptake and implementation of the RTS,S/AS01 malaria vaccine in sub-Saharan African countries: status 2 years following the WHO recommendation
Source: PubMed Central journal article supplement (PMC11085798; doi:10.1136/bmjgh-2023-014719), 2024-04-30
Supplement: bmjgh-2023-014719supp001.pdf [file bmjgh-2023-014719supp001.pdf]

| Country of Origin            | Type of document            |                                 |                         |                         |                                        |                |                          |                     | Number of documents (N=80) |
|------------------------------|-----------------------------|---------------------------------|-------------------------|-------------------------|----------------------------------------|----------------|--------------------------|---------------------|----------------------------|
|                              | National malaria guidelines | National immunization schedule* | National malaria policy | National strategic plan | Newsletter/ News article Press release | Program review | Program operational plan | Therapeutic regimen |                            |
| Angola                       |                             | √                               |                         |                         |                                        |                | √                        |                     | 2                          |
| Benin                        |                             | √                               |                         | √                       | √                                      |                |                          |                     | 3                          |
| Burkina Faso                 | √                           | √                               |                         |                         |                                        |                | √                        |                     | 3                          |
| Burundi                      |                             | √                               |                         | √                       |                                        |                |                          |                     | 2                          |
| Cameroon                     |                             | √                               |                         | √                       | √√√                                    |                |                          |                     | 5                          |
| Central African Republic     |                             | √                               |                         |                         |                                        |                |                          |                     | 1                          |
| Chad                         |                             | √                               |                         |                         |                                        |                |                          |                     | 1                          |
| Congo                        |                             | √                               |                         |                         |                                        |                |                          |                     | 1                          |
| Democratic Republic of Congo |                             | √                               |                         |                         |                                        |                | √                        |                     | 2                          |
| Equatorial Guinea            |                             | √                               |                         |                         |                                        |                |                          |                     | 1                          |
| Ethiopia                     |                             | √                               |                         | √                       |                                        |                |                          |                     | 2                          |
| Gabon                        |                             | √                               |                         |                         |                                        |                |                          |                     | 1                          |
| Gambia                       |                             | √                               |                         |                         |                                        |                |                          |                     | 1                          |
| Ghana                        |                             | √                               | √                       | √√                      | √                                      |                |                          |                     | 5                          |
| Guinea                       |                             | √                               |                         | √                       |                                        |                |                          |                     | 2                          |
| Guinea Bissau                |                             | √                               |                         |                         |                                        |                |                          |                     | 1                          |
| Ivory Coast                  | √                           | √                               |                         | √√                      |                                        |                |                          | √                   | 5                          |
| Kenya                        |                             | √√                              |                         |                         | √                                      |                |                          |                     | 3                          |
| Liberia                      |                             | √                               |                         |                         | √                                      |                |                          |                     | 2                          |
| Madagascar                   |                             | √                               |                         | √                       |                                        |                |                          |                     | 2                          |
| Malawi                       |                             | √                               |                         | √                       | √√√                                    |                |                          |                     | 5                          |
| Mali                         |                             | √                               |                         | √                       |                                        |                | √                        |                     | 3                          |
| Mozambique                   |                             | √                               |                         |                         |                                        |                | √                        |                     | 2                          |
| Niger                        |                             | √                               |                         |                         |                                        |                | √                        |                     | 2                          |
| Nigeria                      |                             | √                               |                         | √                       | √√                                     |                | √                        |                     | 5                          |
| Rwanda                       |                             | √                               |                         |                         |                                        | √              |                          |                     | 2                          |
| Senegal                      | √√                          | √                               |                         |                         |                                        |                |                          |                     | 3                          |
| Sierra Leone                 |                             | √                               |                         |                         |                                        |                |                          |                     | 1                          |
| South Sudan                  |                             | √                               |                         |                         | √                                      |                |                          |                     | 2                          |
| Tanzania                     |                             | √                               |                         |                         |                                        |                | √                        |                     | 2                          |

|              |   |    |   |    |   |   |   |   |    |
|--------------|---|----|---|----|---|---|---|---|----|
| Togo         |   | √  |   |    |   |   |   |   | 1  |
| Uganda       |   | √  |   |    | √ |   | √ |   | 3  |
| Zambia       |   | √  |   | √  |   | √ |   |   | 3  |
| Zimbabwe     |   | √  |   |    |   |   |   |   | 1  |
| <b>Total</b> | 4 | 35 | 1 | 14 | 9 | 2 | 9 | 1 | 80 |

\*34 of the immunisation schedules obtained from the WHO immunization dashboard; one (Kenya) obtained from the Ministry of Health website. Empty cells in the table document not obtained from search or direct contacts.

Table S1: Characteristics of documents
