# Supplementary material for: Policy uptake and implementation of the RTS,S/AS01 malaria vaccine in sub-Saharan African countries: status 2 years following the WHO recommendation
Source: PubMed Central journal article supplement (PMC11085798; doi:10.1136/bmjgh-2023-014719), 2024-04-30
Supplement: bmjgh-2023-014719supp002.pdf [file bmjgh-2023-014719supp002.pdf]

Table S2: Status and plans of malaria vaccine roll-out by country

| Country      | Type of vaccine |     |      | Approach for vaccine introduction     | Vaccine schedule             | Mass campaign | Approved by GAVI for support*<br>* | Roll-out plans | Additional information (Source)*                                                                                                                                                                                                                                                                                                                                                                                                                                                                                                                                    |
|--------------|-----------------|-----|------|---------------------------------------|------------------------------|---------------|------------------------------------|----------------|---------------------------------------------------------------------------------------------------------------------------------------------------------------------------------------------------------------------------------------------------------------------------------------------------------------------------------------------------------------------------------------------------------------------------------------------------------------------------------------------------------------------------------------------------------------------|
|              | RTS,S/AS01      | R21 | Both |                                       |                              |               |                                    |                |                                                                                                                                                                                                                                                                                                                                                                                                                                                                                                                                                                     |
| Benin        | √               |     |      |                                       | 6, 7, 9 and 18 months        |               | Yes                                | Yes            | First vaccinations expected to take place within a few months following the January 2024 delivery of 215,900 RTS,S/AS01 doses.<br><a href="https://www.voaafrica.com/a/benin-receives-first-doses-of-malaria-vaccine/7441896.html">https://www.voaafrica.com/a/benin-receives-first-doses-of-malaria-vaccine/7441896.html</a>                                                                                                                                                                                                                                       |
| Burkina Faso |                 |     | √    | Not mentioned                         | 4 doses starting at 5 months |               | Yes                                | Yes            | Following the promising results from a Phase 2b trial of the R21 malaria vaccine in Nanoro, Burkina Faso, PMI will support the MoH to develop a vaccine roadmap and timeline. (U.S. President's Malaria Initiative: Burkina Faso Malaria Operational Plan FY 2023)                                                                                                                                                                                                                                                                                                  |
| Cameroon     | √               |     |      | Integration into immunisation program | Starts at 6 months           |               | Yes                                | Yes            | The vaccine is being rolled out across 42 health districts in the country's 10 regions in public and private health facilities. The launch comes after Cameroon received 331 200 doses of the vaccine in November 2023.<br>1. <a href="https://www.who.int/news/item/22-11-2023-shipments-to-african-countries-herald-final-steps-toward-broader-vaccination-against-malaria--gavi--who-and-unicef">https://www.who.int/news/item/22-11-2023-shipments-to-african-countries-herald-final-steps-toward-broader-vaccination-against-malaria--gavi--who-and-unicef</a> |

|                              |   |  |  |                                                      |                       |                               |     |     |                                                                                                                                                                                                                                                                                                                                                                                                                                                                                                                                                                                                                                                                                                                                                                                                                                                                                                                                                                                                                                            |
|------------------------------|---|--|--|------------------------------------------------------|-----------------------|-------------------------------|-----|-----|--------------------------------------------------------------------------------------------------------------------------------------------------------------------------------------------------------------------------------------------------------------------------------------------------------------------------------------------------------------------------------------------------------------------------------------------------------------------------------------------------------------------------------------------------------------------------------------------------------------------------------------------------------------------------------------------------------------------------------------------------------------------------------------------------------------------------------------------------------------------------------------------------------------------------------------------------------------------------------------------------------------------------------------------|
|                              |   |  |  |                                                      |                       |                               |     |     | <ol style="list-style-type: none"> <li>2. <a href="https://www.afro.who.int/countries/cameroon/news/cameroon-kicks-malaria-vaccine-rollout">https://www.afro.who.int/countries/cameroon/news/cameroon-kicks-malaria-vaccine-rollout</a></li> <li>3. <a href="https://www.statnews.com/2024/01/22/gsk-malaria-vaccine-mosquirix-rollout-africa/">https://www.statnews.com/2024/01/22/gsk-malaria-vaccine-mosquirix-rollout-africa/</a></li> <li>4. <a href="https://www.statnews.com/2024/01/22/gsk-malaria-vaccine-mosquirix-rollout-africa/">https://www.statnews.com/2024/01/22/gsk-malaria-vaccine-mosquirix-rollout-africa/</a></li> </ol>                                                                                                                                                                                                                                                                                                                                                                                             |
| Democratic Republic of Congo |   |  |  |                                                      |                       |                               | Yes | Yes | PMI plans to support the introduction of the malaria vaccine into health facilities through the reinforcement of healthcare workers' capacity, supportive supervision, malaria data (including vaccine administration) monitoring (U.S. President's Malaria Initiative, Democratic Republic of the Congo Malaria Operational Plan FY 2023)                                                                                                                                                                                                                                                                                                                                                                                                                                                                                                                                                                                                                                                                                                 |
| Gabon                        |   |  |  |                                                      |                       |                               | No  |     | Do not have a plan yet but are considering the introduction of the malaria vaccine in the 2023-2026 Malaria strategic plan (Direct contact with a country representative)                                                                                                                                                                                                                                                                                                                                                                                                                                                                                                                                                                                                                                                                                                                                                                                                                                                                  |
| Ghana                        | V |  |  | Pilot and full integration into immunisation program | 6, 7, 9 and 18 months | Yes, for children 6-59 months | Yes |     | <ol style="list-style-type: none"> <li>1. <a href="https://immunizationdata.who.int/pages/schedule-by-country/gha.html?DISEASECODE=&amp;TARGETPOP_GENERAL=">https://immunizationdata.who.int/pages/schedule-by-country/gha.html?DISEASECODE=&amp;TARGETPOP_GENERAL=</a></li> <li>2. <a href="https://d1u4sg1s9ptc4z.cloudfront.net/uploads/2023/01/FY-2023-Ghana-MOP.pdf">https://d1u4sg1s9ptc4z.cloudfront.net/uploads/2023/01/FY-2023-Ghana-MOP.pdf</a></li> <li>3. <a href="https://www.malariavaccine.org/news-events/news/phased-expansion-malaria-vaccine-use-begins-more-areas-africa">https://www.malariavaccine.org/news-events/news/phased-expansion-malaria-vaccine-use-begins-more-areas-africa</a></li> <li>4. <a href="https://www.who.int/docs/default-source/immunization/mvip/framework_for_policy_decision_on_rtss-as01_malaria_vaccine.pdf?sfvrsn=ce4d2025_8">https://www.who.int/docs/default-source/immunization/mvip/framework_for_policy_decision_on_rtss-as01_malaria_vaccine.pdf?sfvrsn=ce4d2025_8</a></li> </ol> |

|         |   |  |   |                                                      |                       |  |     |  |                                                                                                                                                                                                                                                                                                                                                                                                                                                                                                                                                                                                            |
|---------|---|--|---|------------------------------------------------------|-----------------------|--|-----|--|------------------------------------------------------------------------------------------------------------------------------------------------------------------------------------------------------------------------------------------------------------------------------------------------------------------------------------------------------------------------------------------------------------------------------------------------------------------------------------------------------------------------------------------------------------------------------------------------------------|
|         |   |  |   |                                                      |                       |  |     |  | 5. National guideline from direct contact with a country representative)                                                                                                                                                                                                                                                                                                                                                                                                                                                                                                                                   |
| Guinea  |   |  |   |                                                      |                       |  | Yes |  | Are planning a pilot in 5 districts – Kankan, Yomou, Mamou, Gaoual and Siguiri. Full integration into immunisation program planned after pilot. The vaccine schedule planned is 6,7,9 and 18 or 22 or 24 months.<br>(Direct contact with a country representative)                                                                                                                                                                                                                                                                                                                                         |
| Kenya   |   |  | √ | Pilot and full integration into immunisation program | 6, 7, 9 and 24 months |  | Yes |  | <ol style="list-style-type: none"> <li><a href="https://www.health.go.ke/">https://www.health.go.ke/</a>)</li> <li><a href="https://www.the-star.co.ke/news/2022-04-25-malaria-vaccine-being-tested-in-kenya-enters-homestretch/">https://www.the-star.co.ke/news/2022-04-25-malaria-vaccine-being-tested-in-kenya-enters-homestretch/</a></li> <li><a href="https://immunizationdata.who.int/pages/schedule-by-country/ken.html?DISEASECODE=&amp;TARGETPOP_GENERAL=">https://immunizationdata.who.int/pages/schedule-by-country/ken.html?DISEASECODE=&amp;TARGETPOP_GENERAL=</a>)</li> </ol>              |
| Liberia | √ |  |   | Not mentioned                                        |                       |  | Yes |  | 112,000 RTS,S/AS01 doses delivered in January 2024. Ministry of health of Liberia plans to start vaccination in April 2024.<br><a href="https://www.afro.who.int/countries/liberia/news/ministry-health-gavi-who-and-unicef-announce-arrival-112000-doses-malaria-vaccine-liberia">https://www.afro.who.int/countries/liberia/news/ministry-health-gavi-who-and-unicef-announce-arrival-112000-doses-malaria-vaccine-liberia</a>                                                                                                                                                                           |
| Malawi  | √ |  |   | Pilot and full integration into immunisation program | 5, 6, 7 and 22 months |  | Yes |  | <ol style="list-style-type: none"> <li><a href="https://immunizationdata.who.int/pages/schedule-by-country/mwi.html?DISEASECODE=MALARIA&amp;TARGETPOP_GENERAL=">https://immunizationdata.who.int/pages/schedule-by-country/mwi.html?DISEASECODE=MALARIA&amp;TARGETPOP_GENERAL=</a></li> <li><a href="https://www.who.int/docs/default-source/immunization/mvip/framework_for_policy_decision_on_rtss-as01_malaria_vaccine.pdf?sfvrsn=ce4d2025_8">https://www.who.int/docs/default-source/immunization/mvip/framework_for_policy_decision_on_rtss-as01_malaria_vaccine.pdf?sfvrsn=ce4d2025_8</a></li> </ol> |

|         |   |  |   |                       |  |  |     |     |                                                                                                                                                                                                                                                                                                                                                                                                                                                                                                                                                                                                                                                                                                                                                                                                                                                         |
|---------|---|--|---|-----------------------|--|--|-----|-----|---------------------------------------------------------------------------------------------------------------------------------------------------------------------------------------------------------------------------------------------------------------------------------------------------------------------------------------------------------------------------------------------------------------------------------------------------------------------------------------------------------------------------------------------------------------------------------------------------------------------------------------------------------------------------------------------------------------------------------------------------------------------------------------------------------------------------------------------------------|
|         |   |  |   |                       |  |  |     |     | <p>3. <a href="https://www.who.int/news-room/feature-stories/detail/mothers-in-malawi-value-the-first-malaria-vaccine">https://www.who.int/news-room/feature-stories/detail/mothers-in-malawi-value-the-first-malaria-vaccine</a></p> <p>4. <a href="https://www.who.int/news/item/20-04-2021-rt-s-malaria-vaccine-reaches-more-than-650-000-children-in-ghana-kenya-and-malawi-through-groundbreaking-pilot-programme">https://www.who.int/news/item/20-04-2021-rt-s-malaria-vaccine-reaches-more-than-650-000-children-in-ghana-kenya-and-malawi-through-groundbreaking-pilot-programme</a></p> <p>5. <a href="https://www.malariavaccine.org/news-events/news/phased-expansion-malaria-vaccine-use-begins-more-areas-africa">https://www.malariavaccine.org/news-events/news/phased-expansion-malaria-vaccine-use-begins-more-areas-africa</a> )</p> |
| Mali    | v |  |   | Not mentioned         |  |  | No  | Yes | National malaria strategic plan 2023-2027 -yet to be published (Direct contact with a country representative)                                                                                                                                                                                                                                                                                                                                                                                                                                                                                                                                                                                                                                                                                                                                           |
| Nigeria |   |  | v | Not mentioned         |  |  | No  | Yes | Applied for 1 million doses of the RTS,S/AS01 vaccine to reach 250,000 children. Expected in the country by 2024. Conditional approval of the R21 vaccine to be used in phase 4 trials in the country. (Statement on malaria vaccine in Nigeria shared by Direct contact with a country representative)                                                                                                                                                                                                                                                                                                                                                                                                                                                                                                                                                 |
| Senegal |   |  |   |                       |  |  | No  |     | Currently updating guidelines to include the vaccine (Direct contact with a country representative)                                                                                                                                                                                                                                                                                                                                                                                                                                                                                                                                                                                                                                                                                                                                                     |
| Togo    |   |  |   |                       |  |  | No  |     | Hope to update the national guideline in January 2024 following a funding application. (Direct contact with a country representative)                                                                                                                                                                                                                                                                                                                                                                                                                                                                                                                                                                                                                                                                                                                   |
| Uganda  | v |  |   | Phased implementation |  |  | Yes | Yes | Phased introduction due to limited vaccine supply. Phase 1 in 2023/24. Four phases were scheduled between 2023/24 and 2026/27 according to four sub-national categorisation of the districts. ( <a href="http://library.health.go.ug/communicable-disease/malaria/national-malaria-control-division-news-letter">Http://library.health.go.ug/communicable-disease/malaria/national-malaria-control-division-news-letter</a> )                                                                                                                                                                                                                                                                                                                                                                                                                           |
| Zambia  |   |  |   | Not mentioned         |  |  | No  | Yes | ( <a href="https://static1.squarespace.com/static/58d002f017bfcf99fe21889/t/63bd160c30c0dc5ead80cfdb/1673336">https://static1.squarespace.com/static/58d002f017bfcf99fe21889/t/63bd160c30c0dc5ead80cfdb/1673336</a> )                                                                                                                                                                                                                                                                                                                                                                                                                                                                                                                                                                                                                                   |

|  |  |  |  |  |  |  |  |  |                                                                                 |
|--|--|--|--|--|--|--|--|--|---------------------------------------------------------------------------------|
|  |  |  |  |  |  |  |  |  | <a href="#">347465/Zambia+Malaria+Programme+Review+2021_SIGNED+120722.pdf</a> ) |
|--|--|--|--|--|--|--|--|--|---------------------------------------------------------------------------------|

\* Data obtained from websites and direct contact with country representatives; Websites last accessed January 30, 2024. Empty cells denote information not obtained from search and direct contacts.

Documents obtained for the following countries made no mention of the vaccine: Angola, Benin, Burundi, Cameroon, Central African Republic, Chad, Congo, Equatorial Guinea, Ethiopia, Gambia, Guinea Bissau, Ivory Coast, Liberia, Madagascar, Mozambique, Niger, Rwanda, Sierra Leone, South Sudan, Zimbabwe. \*\*Other countries not on the table but approved by GAVI for support in the roll-out of the vaccine as of March 2024: Chad, Central African Republic, South Sudan, Sierra Leone, Burundi, Niger (partial supply), Mozambique and Sudan (both countries have no immediate allocation due to limited vaccine availability), and Ivory Coast.
